# Supplementary material for: Increasing cleavage specificity and activity of restriction endonuclease KpnI
Source: PubMed Central journal article supplement (PMC3834813; doi:10.1093/nar/gkt734), 2013-08-19
Supplement: supp_gkt734_nar-01369-f-2013-File013.pdf [file supp_gkt734_nar-01369-f-2013-File013.pdf]

**Figure S1**

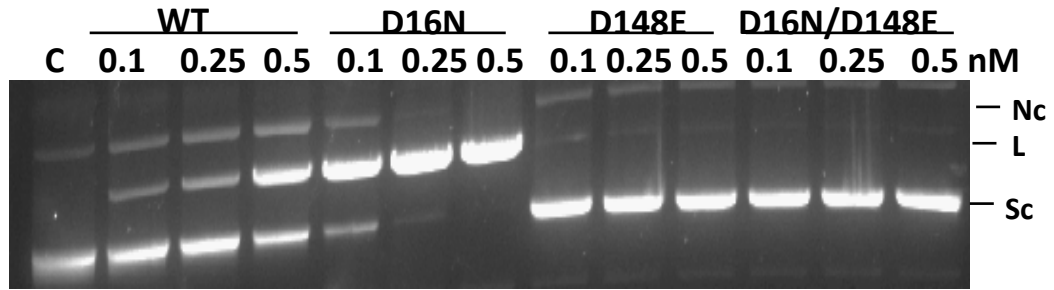

**Figure S1. DNA cleavage properties of KpnI and its mutants in the presence of Ca<sup>2+</sup>.** pUC18 DNA (14 nM) cleavage was carried out with different concentrations of WT and mutants as indicated in the presence of 2 mM Ca<sup>2+</sup>. The reactions were incubated at 37 °C for 30 min and analyzed on 1% agarose gel. Nc, L, and Sc indicate the positions of nicked circular, linear, and supercoiled forms of the plasmid, respectively.

**Figure S2**

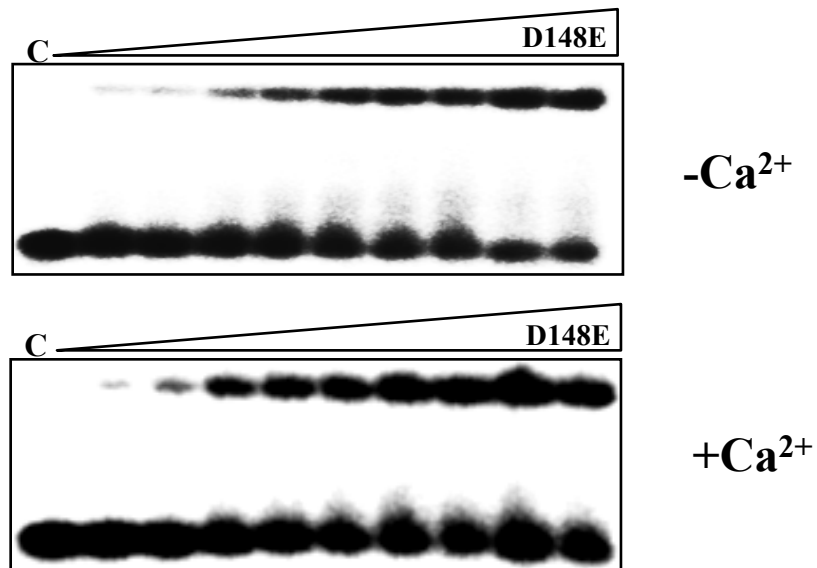

**Figure S2. Effect of Ca<sup>2+</sup> on the DNA binding ability of mutant D148E.** Different concentrations of KpnI were incubated with 1 nM of end labeled canonical oligonucleotide duplexes in the absence or presence of inhibitory concentrations (2 mM) of Ca<sup>2+</sup> in binding buffer (20 mM Tris-HCl, pH 7.4, 25 mM NaCl, and 5 mM 2-mercaptoethanol) on ice for 15 min before analyzed on a native polyacrylamide gels.

**Figure S3**

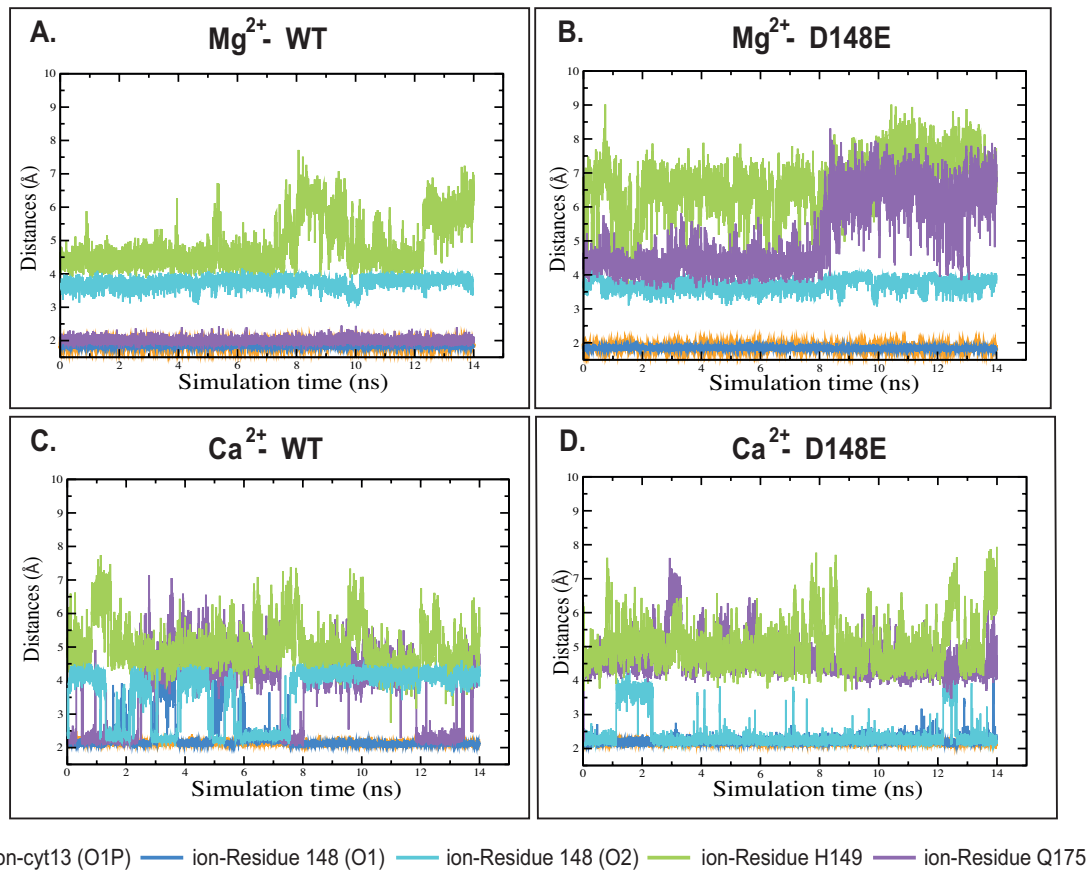

**Figure S3. Molecular dynamics simulations of the distance between the metal ions and oxygen atoms of active site residues.** The distance between the metal ion, oxygen atom of the phosphate group of the scissile phosphodiester bond Cyt13 (orange), Asp/Glu148 O1 (dark blue), Asp/Glu148 O2 (light blue), His149 NE (green) and Q175 OE1 (purple) over 14 ns simulation time are plotted for Mg<sup>2+</sup> with WT (A) and mutant D148E (B), and for Ca<sup>2+</sup> with WT (C) and mutant D148E (D), respectively.

**Figure S4**

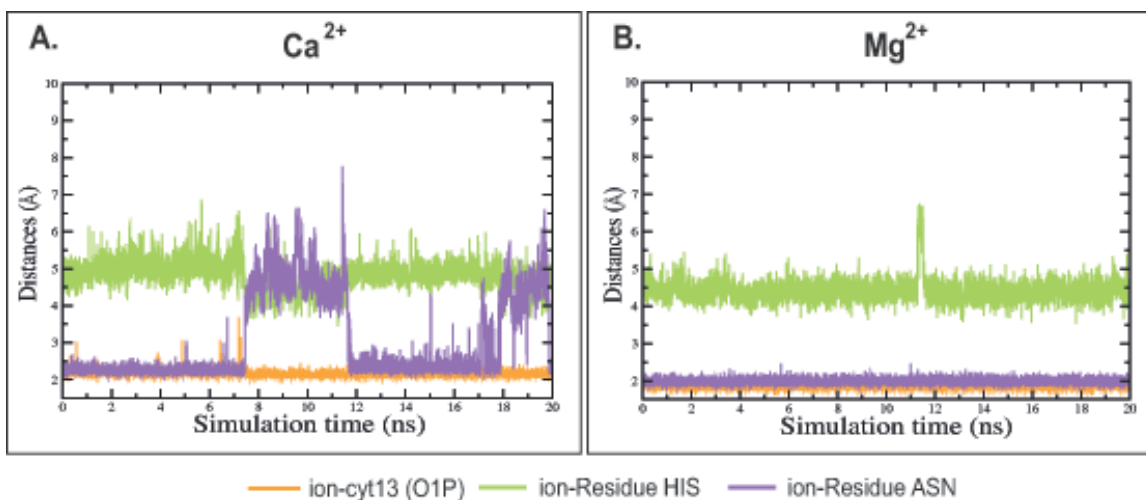

**Figure S4. Distance between the metal ions and oxygen atoms of active site residues in the MD simulations of PpoI.** The distance between the metal ion, oxygen atom of the phosphate group of the scissile phosphodiester bond Cyt13 (orange), His (green) and Asn (purple) of I-PpoI over 20 ns simulation time are plotted for  $\text{Ca}^{2+}$  (A) and for  $\text{Mg}^{2+}$  (B), respectively.

**Figure S5**

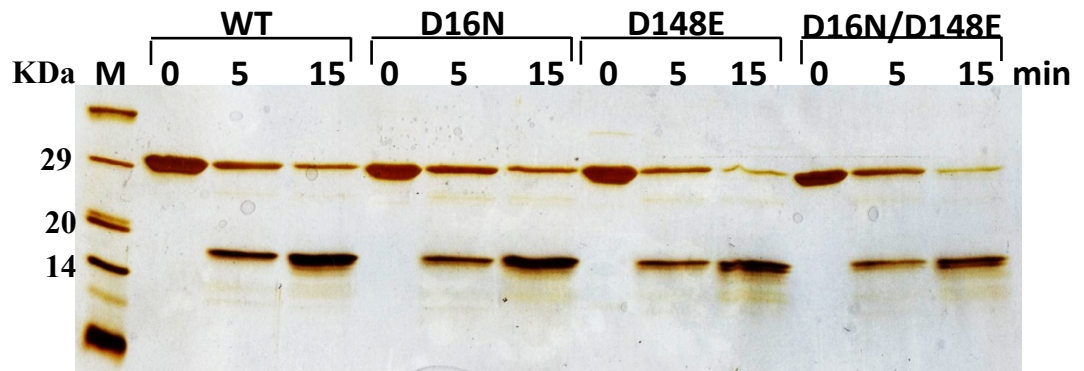

**Figure S5. Trypsin digestion profiles of KpnI and its mutants.** Proteolytic digestions of different KpnI and its mutants (1 mg/ml) were carried out in 50 mM Tris-HCl buffer, pH 8.5, and at 37°C using 2% (w/w) trypsin. 5  $\mu$ l samples of the reaction mixture were taken after various time intervals and proteolysis was stopped with SDS-PAGE loading buffer containing PMSF. Samples were analyzed by 15% SDS-PAGE and visualized by silver staining.

## Supplementary Table S1

---

Oligonucleotide duplex used for EMSA and DNA cleavage

---

|               |                                         |
|---------------|-----------------------------------------|
| Canonical     | 5' – ATTGCGT <b>GGTACCC</b> GCTCTT – 3' |
|               | 3' – TAACGC <b>CCATGGG</b> CGAGAA – 5'  |
| Non-canonical | 5' – ATTGCGT <b>GaTACCC</b> GCTCTT – 3' |
|               | 3' – TAACGT <b>CtATGGG</b> CGAGAA – 5'  |

---
